# Supplementary material for: Soluble and Exosome-Bound α-Galactosylceramide Mediate Preferential Proliferation of Educated NK Cells with Increased Anti-Tumor Capacity
Source: PubMed Central journal article supplement (PMC7830699; doi:10.3390/cancers13020298), 2021-01-15
Supplement: cancers-13-00298-s001.pdf [file cancers-13-00298-s001.pdf]

# Supplementary Materials: Soluble and Exosome-Bound $\alpha$ -Galactosylceramide Mediate Preferential Proliferation of Educated NK Cells with Increased Anti-Tumor Capacity

Arnika K. Wagner, Ulf Gehrman, Stefanie Hiltbrunner, Valentina Carannante, Thuy T. Luu, Tanja I. Näslund, Hanna Brauner, Nadir Kadri, Klas Kärre and Susanne Gabriellsson

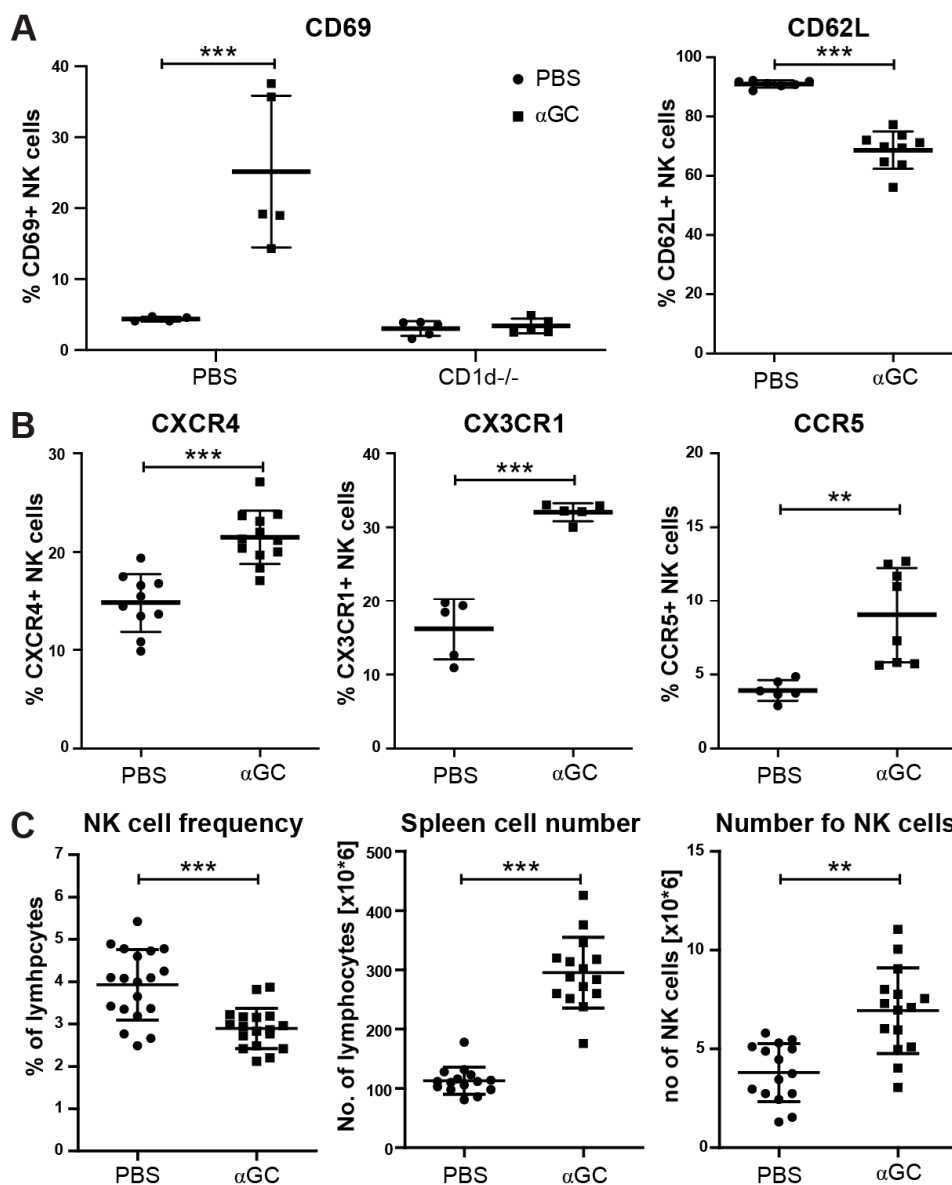

**Figure S1.** iNKT cell-dependent activation of NK cells by  $\alpha$ GC in vivo. C57Bl/6 or CD1d<sup>-/-</sup> mice were injected i.v. with PBS or 200ng soluble  $\alpha$ GC. (a) Frequency of activation markers was measured on day 2 (CD69<sup>+</sup> NK cells) or day 7 (CD62L<sup>+</sup> NK cells) after treatment. (b) Frequency of chemokine receptors CXCR4, CX3CR1 and CCR5 was assessed at day 7 post-treatment. (c) NK cell frequency, spleen cell number and number of NK cells was determined at day 7 after treatment with  $\alpha$ GC. Data are pooled from 2–4 independent experiments and show 4–9 mice per group (a), 5–12 mice per group (b) and 15–19 mice per group (c). Error bars denote SD. Significant differences were calculated with

two-way ANOVA with Tukey's correction for multiple testing (a, CD69) or unpaired two-tailed t test for all other subfigures and are denoted \*\*  $p < 0.01$ , \*\*\*  $p < 0.001$ .

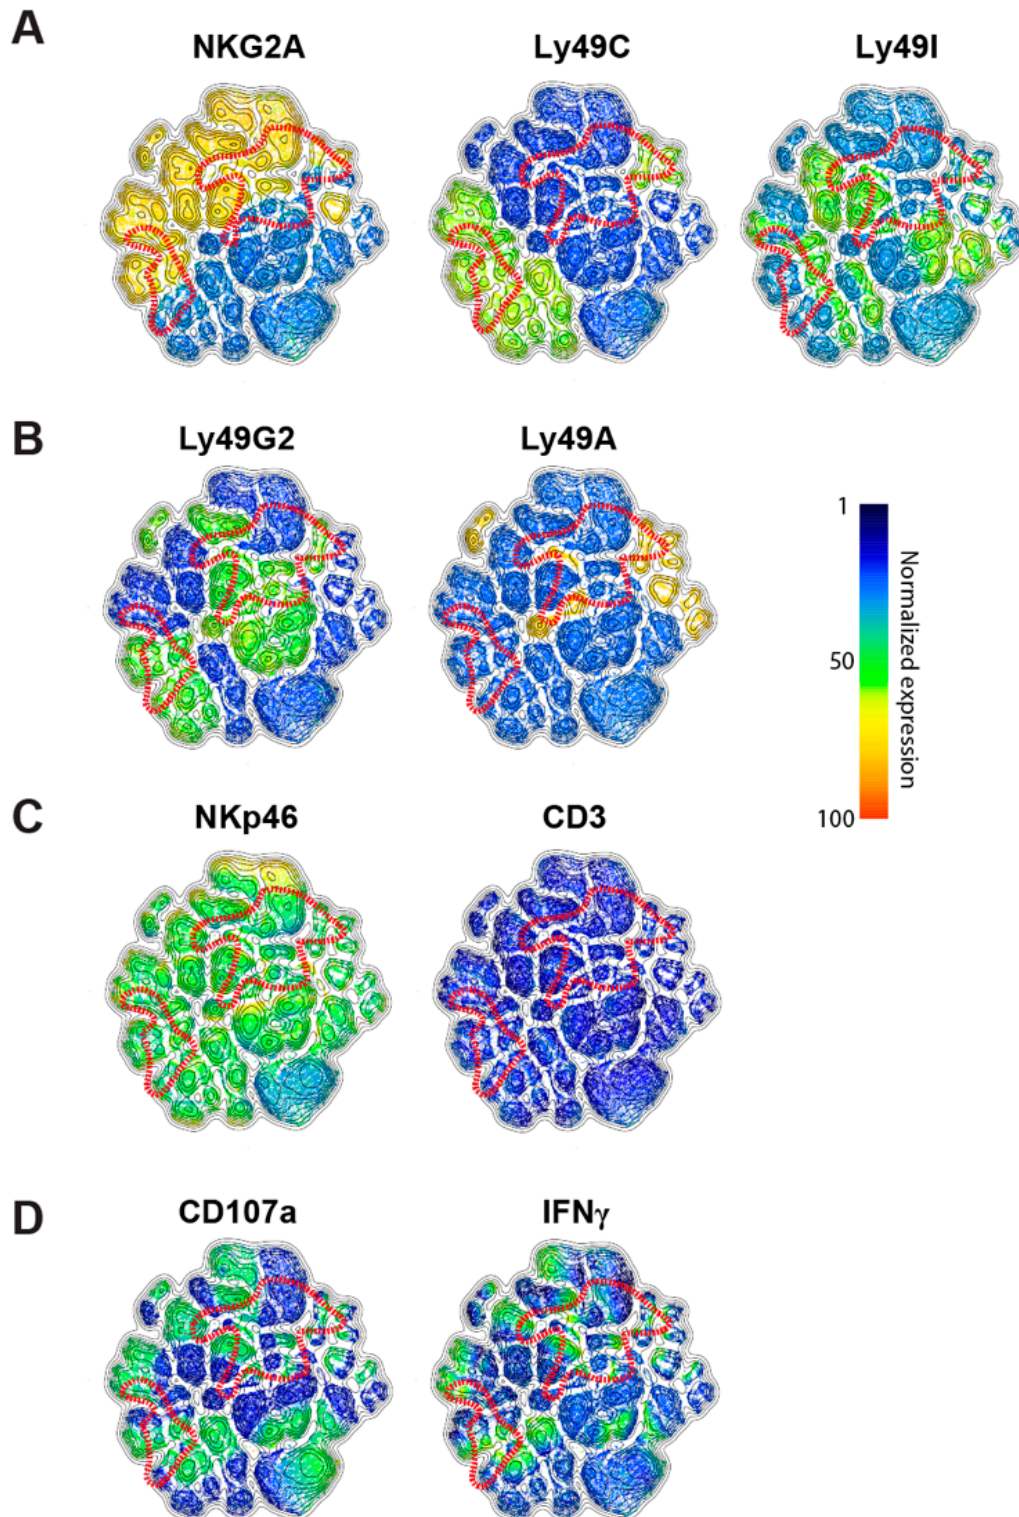

**Figure S2.** tSNE analysis of NK cell receptors. Flow cytometry data of mice of four groups (B6, B6+ $\alpha$ GC, CD1d $^{-/-}$ , CD1d $^{-/-}$ + $\alpha$ GC) was analyzed with t-distributed stochastic neighbor embedding algorithm as previously described<sup>39</sup>. tSNE plots of individual educating inhibitory receptors (a), non-educating inhibitory receptors (b), NK cell defining markers (c) and functional markers (d). Gates were determined manually on areas with 10% increase of cells on tSNE plots of Fig. 2F and

subsequently applied to all remaining tSNE plots. Data is pooled from 3 independent experiments with 6 mice per group.

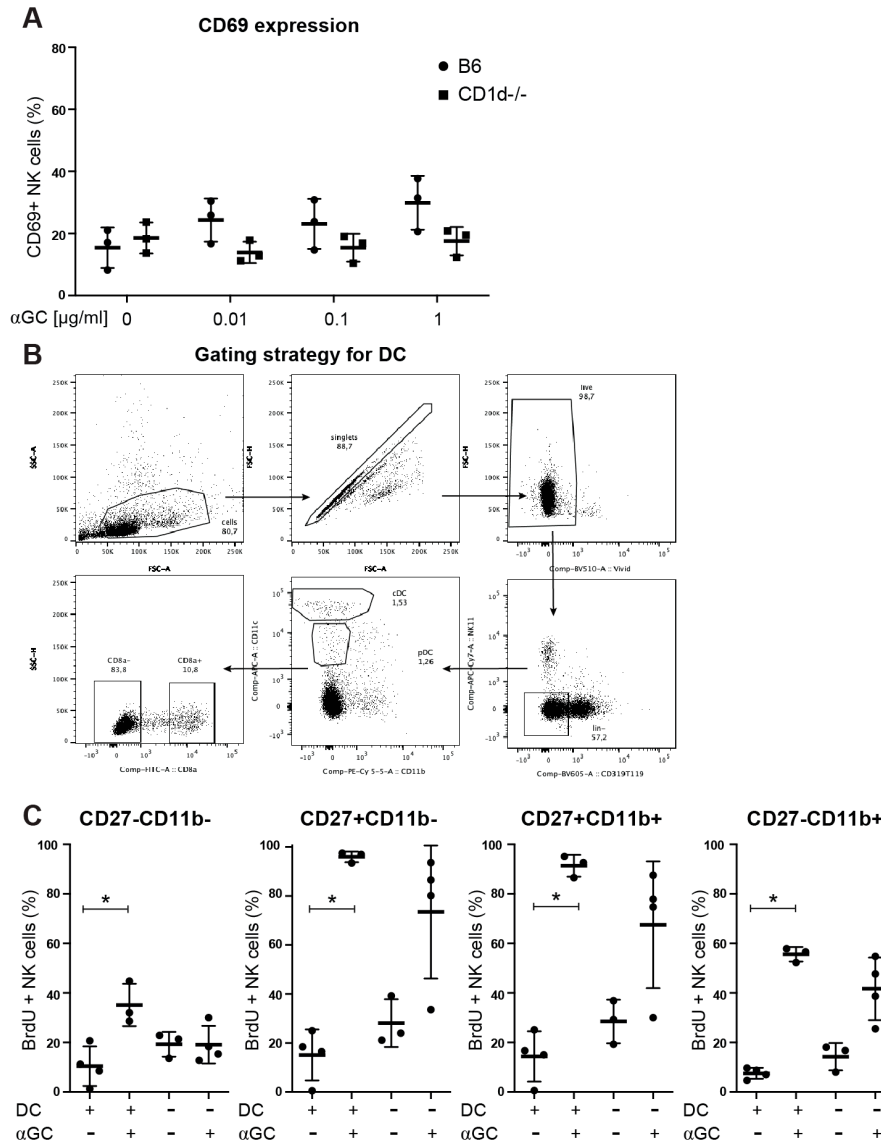

**Figure S3.** DCs are necessary for NK cell activation. (a) Spleen cells of B6 and CD1d<sup>-/-</sup> were isolated and cultured *in vitro* in the presence of absence of  $\alpha$ GC (0.01, 0.1, 1  $\mu$ g/ml). Total spleen cells were cultured and stimulated and CD69 expression measured on NK cells after 24h. (b) Gating strategy for CD8 $\alpha^+$  cDC1 cells. (c) CD11c.DOG mice were treated with PBS (DC+) or DTR (DC-) for 7 d and received PBS or 200ng of  $\alpha$ GC and were fed BrdU via the drinking water from day 3. NK cells were stained at day 7 and maturation markers CD27 and CD11b and KLRG1 expression was assessed on these maturational subsets. Shown are data from 3 mice per group from one experiment (a) or one experiment with 3-5 mice per group (b). Two-way ANOVA with Tukey's multiple comparison test (a) or Kruskal-wallis test with Dunn's correction for multiple testing (c) was used to determine statistical significance. Error bars indicate SD. \*  $p < 0.05$ .

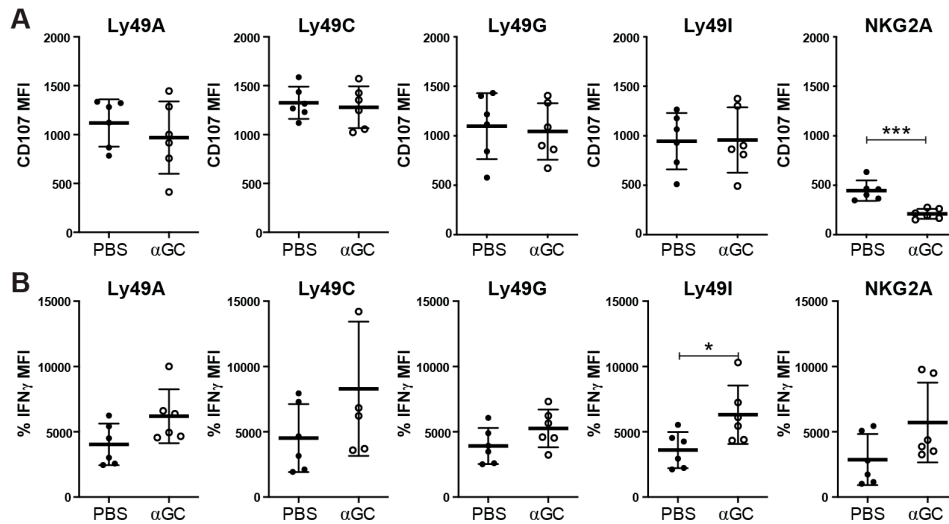

**Figure 5.** Exosomal  $\alpha$ GC has comparable effects on NK cell activation, proliferation and missing self-function. C57Bl/6 mice were injected i.v. with PBS, 40  $\mu$ g Exo( $\alpha$ GC-OVA) or Exo( $\alpha$ GC) or 200 ng soluble  $\alpha$ GC (equivalent to the amount on 40  $\mu$ g Exo( $\alpha$ GC-OVA)/Exo( $\alpha$ GC))<sup>32</sup>. Expression of surface markers was measured by flow cytometry on d7. Expression of adhesion molecule (a) CD62L, and chemokine receptors (b) CXCR4, (c) CX3CR1, and (d) CCR5 are shown on total NK cells. Data are pooled from 2–4 independent experiments with 4–12 mice per group. Significant differences were calculated with one-way ANOVA with Tukey’s correction for multiple testing and are denoted \*  $p < 0.05$ , \*\*  $p < 0.01$ , \*\*\*  $p < 0.001$ .



**Figure 54.** PMA/ionomycin-stimulated NK cells show minimal changes in functional response. C57Bl/6 mice were injected i.v. with PBS or 200 ng soluble  $\alpha$ GC. 3 d after in vivo stimulation, degranulation (by CD107 positivity) and cytokine production capacity (IFN $\gamma$  production) were assessed as for Figure 3. (a) CD107 and (b) IFN $\gamma$  production of C57Bl/6 NK cell subsets based on the inhibitory receptors (Ly49G2 vs. Ly49A, Ly49C vs. Ly49I, NKG2A) stimulated with PMA/ionomycin. Data is pooled from 3 independent experiments with 6 mice per group. Unpaired, two-tailed t-test was used to determine statistical significance. Error bars indicate \*  $p < 0.05$ .

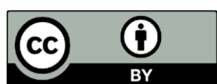

© 2021 by the authors. Licensee MDPI, Basel, Switzerland. This article is an open access article distributed under the terms and conditions of the Creative Commons Attribution (CC BY) license (<http://creativecommons.org/licenses/by/4.0/>).
